# Supplementary material for: Rhizosphere Fungal Dynamics in Sugarcane during Different Growth Stages
Source: MDPI journal article supplement (doi:10.3390/ijms24065701), 2023-03-16
Supplement: s1 [file s1]

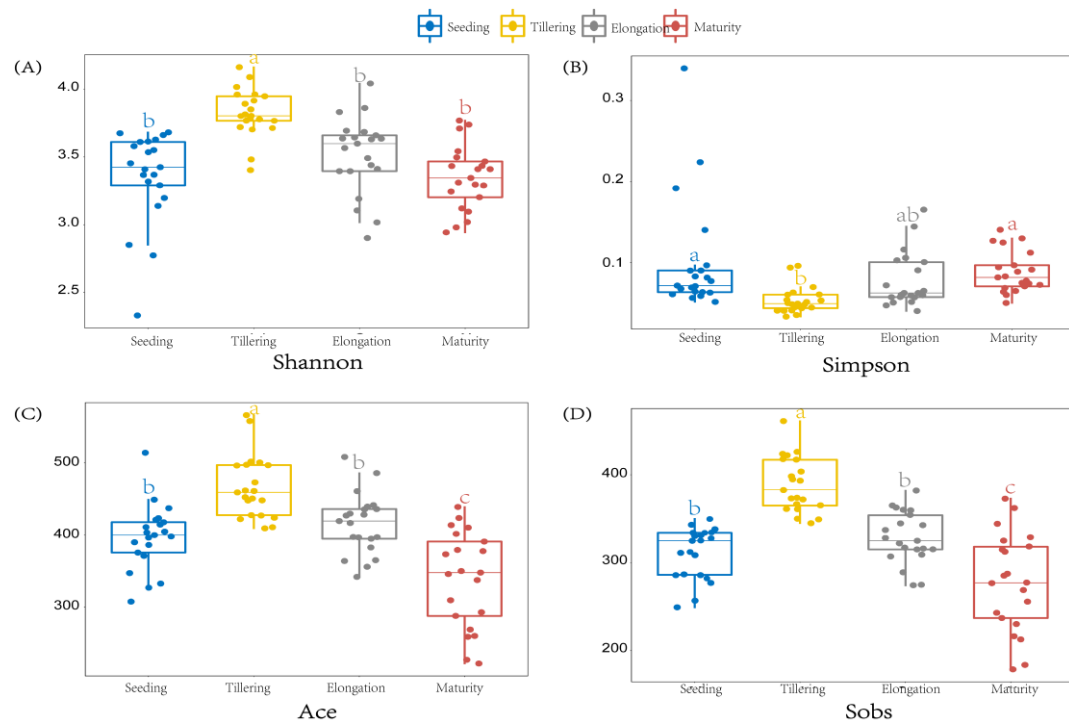

**Figure S1.** Box plots of rhizosphere microbial  $\alpha$ -diversity of sugarcane in different seasons. The horizontal bars in the boxes represent the median. All samples are plotted as individual points. Letters "a, b, c" represent significant differences between groups (FDR adjusted  $p < 0.05$ ).

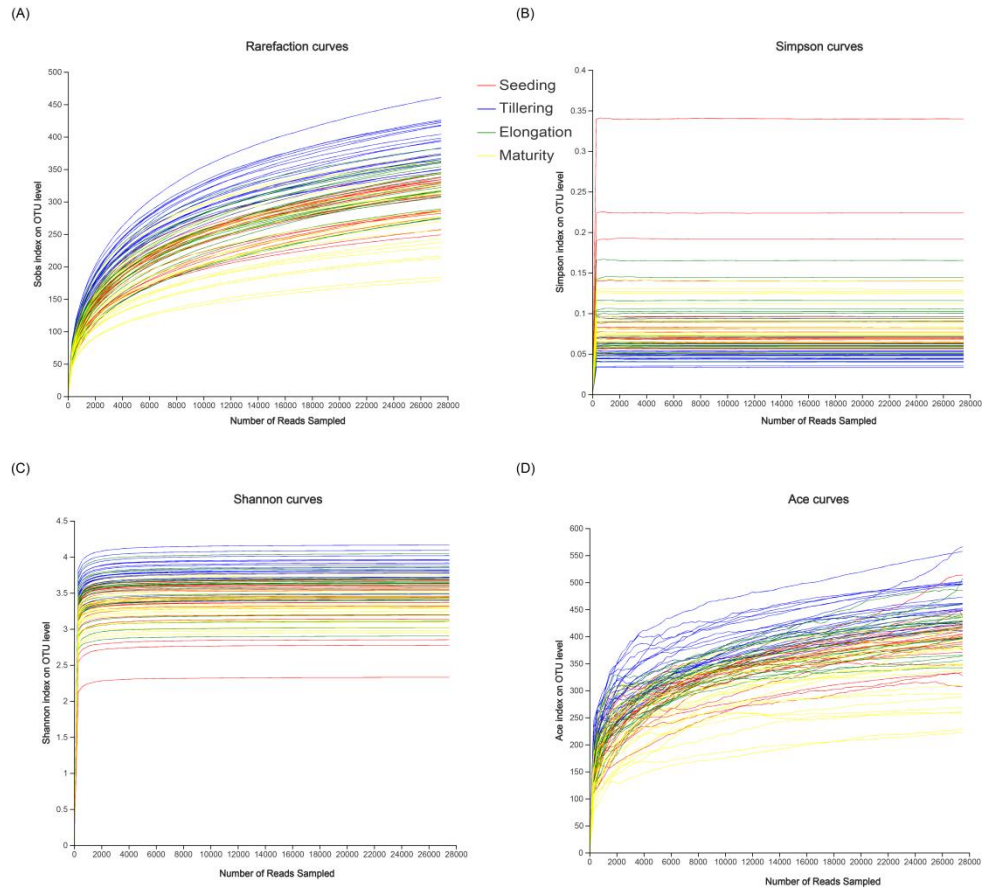

**Figure S2.** The rarefaction curve of fungal alpha diversity index, the horizontal coordinate is the number of reads and the vertical coordinate is the different  $\alpha$ -diversity indices. Different colors in the picture represent different growth stages.

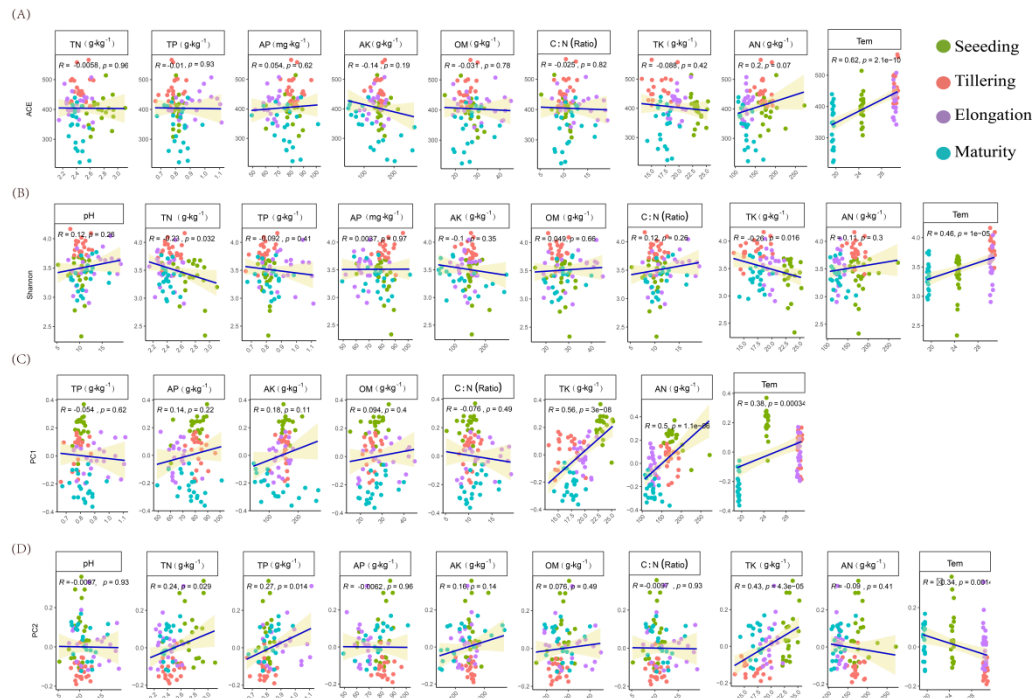

**Figure S3.** Linear relationships among selected microbial characteristics and soil physicochemical variables ( $p < 0.05$ ). The ordinates of each row are the same, and the abscissas are soil properties. Different colors indicate different growth stages.

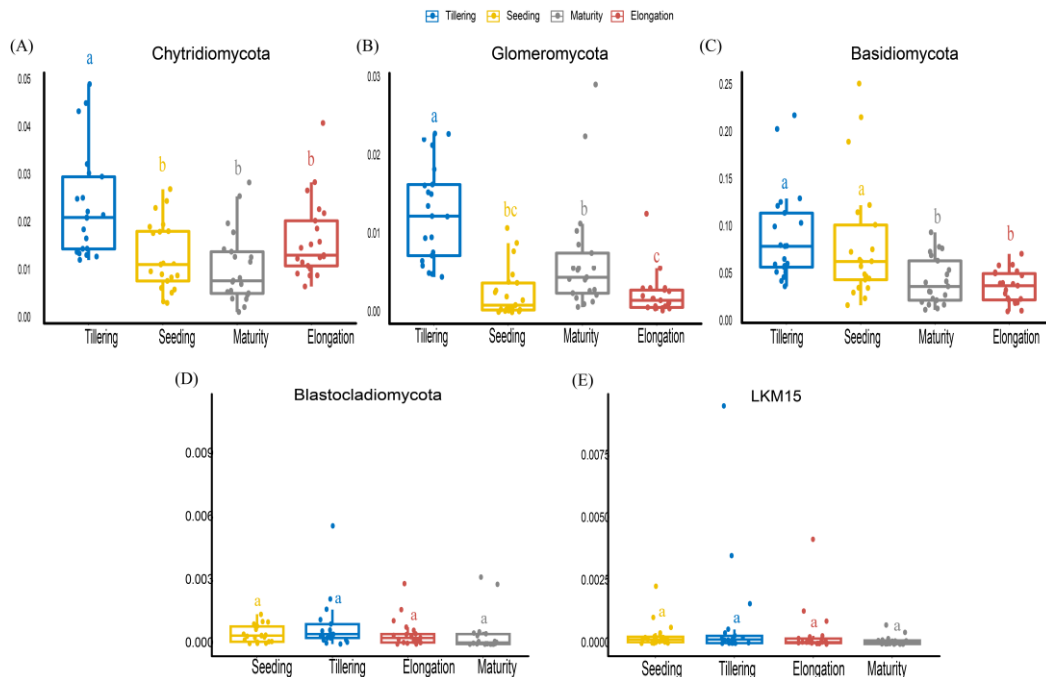

**Figure S4.** The box plot shows the changes of rhizosphere fungi in four

different sugarcane growth stages. Different letters indicate significantly different groups (FDR adjusted  $p < 0.05$ ). Different colors represent different growth stages. The horizontal bars within boxes represent medians.

**Table S1.** Summary table of fungal genera declining or enriched in sugarcane roots in the comparison between seasons.

| Order of comparison |                    |                      |                     |
|---------------------|--------------------|----------------------|---------------------|
|                     | Seeding-Tillering  | Tillering-Elongation | Elongation-Maturity |
| <b>Depleted</b>     | Tremellales        | Chytridiomycota      | Eurotiales          |
|                     | Eurotiales         | Glomeromycota        | Sordariales         |
|                     | Hypocreales        | Saccharomycetales    | Chytridiomycota     |
|                     | Saccharomycetales  | Pezizales            | Hypocreales         |
|                     | Ascobolaceae       | Salpingoeca          | Ascomycota          |
|                     | Pleosporales       | Ascomycota           | Sordariomycetes     |
|                     | Dothideomycetes    | Agaricomycetes       | Pleosporales        |
|                     | Ascomycota         | Galactomyces         | Dothideomycetes     |
|                     | Fusarium           | Eurotiales           | Saccharomycetales   |
|                     | Sordariomycetes    | Hypocreales          | Basidiomycota       |
|                     | Boeremia           | Tremellales          | Tremellales         |
|                     | Tilletiaria        | Microbotryomycetes   | Euglyphida          |
|                     | Capnodiales        | Dissoconium          | Colpodidium         |
|                     | Trichosporon       | Hydnodontaceae       | Capnodiales         |
|                     | Tremella           | Cryptococcus         | Leotiomyces         |
|                     | Thysanophora       | Orbiliales           | Agaricomycetes      |
|                     | Chytridiomycota    | Monosiga             | Aleuria             |
|                     | Exobasidiomycetes  | Tilletiaria          | Hydnodontaceae      |
|                     | Leotiomyces        | Sordariomycetes      | Onygenaceae         |
|                     | Cochliobolus       | Blastocladiomycota   | Obertruria          |
|                     | Nectriaceae        | Atractiella          | Galactomyces        |
|                     | Galactomyces       | RM2-SGM58            | Hypocrea            |
|                     | Blastocladiomycota | Dothideomycetes      | Tilletiaria         |
|                     |                    | Trichosporon         | Exobasidiomycetes   |
|                     |                    | Diaporthe            | Fusarium            |
|                     |                    | Basidiomycota        |                     |
|                     |                    | Cystofilobasidiaceae |                     |

|                 |                  |                   |                    |
|-----------------|------------------|-------------------|--------------------|
| <b>Enriched</b> | Pseudallescheria | Ascobolaceae      | Pezizales          |
|                 | Monosiga         | Onygenaceae       | Tremella           |
|                 | Dissoconium      | Nectriaceae       | Talaromyces        |
|                 | Glomeromycota    | Pseudallescheria  | Glomeromycota      |
|                 | Craspedida       | Pseudoperkinsidae | Nectriaceae        |
|                 | Sordariales      | Cochliobolus      | Trichocomaceae     |
|                 | Pezizales        |                   | Scytinostroma      |
|                 | Agaricomycetes   |                   | Monosiga           |
|                 | Cryptococcus     |                   | Pyxidiophora       |
|                 | Sphaeroeca       |                   | Trichosporon       |
|                 | Bryometopus      |                   | Eurotiomycetes     |
|                 | Salpingoeca      |                   | Exobasidiales      |
|                 | Atractiella      |                   | Cryptococcus       |
|                 | Acrospormum      |                   | Craspedida         |
|                 | Gibberella       |                   | Microbotryomycetes |

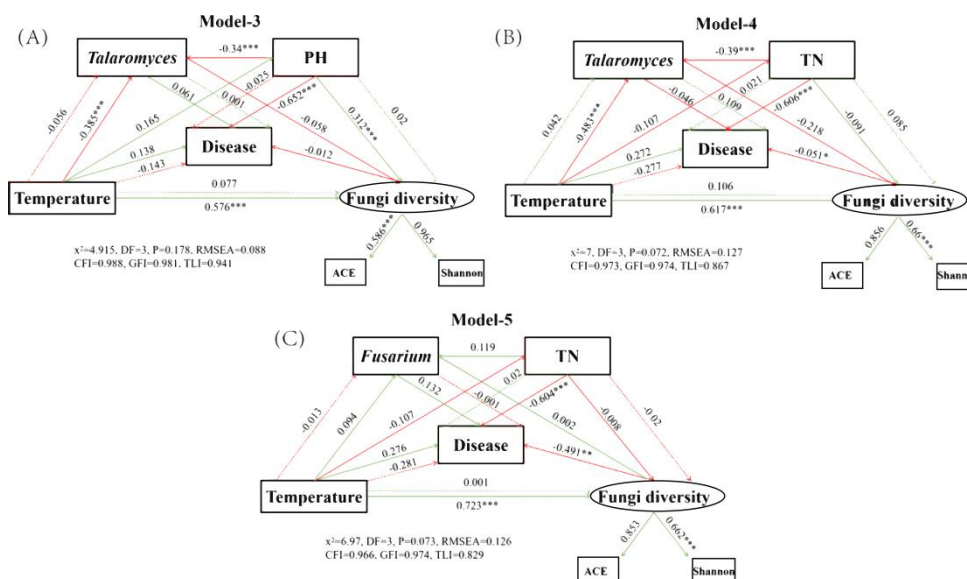

**Figure S5.** Structural Equation Modeling (SEM) analysis showed the contributions of *Talaromyces* (A and B), *Fusarium* (C), temperature, soil and fungi diversity to the sugarcane disease. Soil was represented by mainly compositions including pH and TN (Total Nitrogen); Fungi diversity included ACE and Shannon index. The numbers above the arrows indicate path coefficients. *p*-value: \* < 0.05, \*\* < 0.01, \*\*\* < 0.001.

Table S2 Model parameters summary table

|         | X2    | DF | P     | CFI   | GFI   | TLI   | RMR   | RMSEA | AIC    | BIC    |
|---------|-------|----|-------|-------|-------|-------|-------|-------|--------|--------|
| Model-1 | 4.825 | 3  | 0.185 | 0.987 | 0.982 | 0.937 | 0.037 | 0.086 | 40.825 | 84.58  |
| Model-2 | 1.282 | 3  | 0.733 | 1     | 0.995 | 1.054 | 0.018 | 0     | 37.282 | 81.037 |
| Model-3 | 4.915 | 3  | 0.178 | 0.988 | 0.981 | 0.941 | 0.037 | 0.088 | 40.915 | 84.67  |
| Model-4 | 7     | 3  | 0.072 | 0.973 | 0.974 | 0.867 | 0.049 | 0.127 | 43     | 86.755 |
| Model-5 | 6.97  | 3  | 0.073 | 0.966 | 0.974 | 0.829 | 0.045 | 0.126 | 42.97  | 86.724 |

Table S3 Summary of model-1 internal path coefficients and normalized coefficients

| Model-1                      | Unstandardized |               |                |                  | Standardized          |                            |                             |                               | Standardized Indirect Effects | P     |
|------------------------------|----------------|---------------|----------------|------------------|-----------------------|----------------------------|-----------------------------|-------------------------------|-------------------------------|-------|
|                              | Estimate       | Total Effects | Direct Effects | Indirect Effects | Standardized Estimate | Standardized Total Effects | Standardized Direct Effects | Standardized Indirect Effects |                               |       |
| Fungi diversity<-Temperature | 0.58           | 0.63          | 0.58           | 0.05             | 0.601                 | 0.653                      | 0.601                       | 0.052                         |                               | ***   |
| Fungi diversity<-Fusarium    | -0.074         | -0.074        | -0.074         | 0                | -0.076                | -0.076                     | -0.076                      | 0                             |                               | 0.359 |
| Shannon<-Fungi diversity     | 0.607          | 0.607         | 0.607          | 0                | 0.586                 | 0.586                      | 0.586                       | 0                             |                               | ***   |
| Fusarium<-Temperature        | 0.039          | 0.081         | 0.039          | 0.042            | 0.039                 | 0.081                      | 0.039                       | 0.042                         |                               | 0.718 |
| Disease<-Fungi diversity     | 0.021          | 0.021         | 0.021          | 0                | 0.02                  | 0.02                       | 0.02                        | 0                             |                               | 0.871 |
| Disease<-Temperature         | 0.085          | -0.005        | 0.085          | -0.09            | 0.085                 | -0.005                     | 0.085                       | -0.09                         |                               | 0.43  |
| Ace<-Fungi diversity         | 1              | 1             | 1              | 0                | 0.965                 | 0.965                      | 0.965                       | 0                             |                               |       |
| Fungi diversity<-pH          | 0.338          | 0.32          | 0.338          | -0.019           | 0.351                 | 0.331                      | 0.351                       | -0.02                         |                               | ***   |
| Disease<-Fusarium            | 0.247          | 0.245         | 0.247          | -0.002           | 0.247                 | 0.245                      | 0.247                       | -0.002                        |                               | 0.002 |
| pH<-Temperature              | 0.165          | 0.165         | 0.165          | 0                | 0.165                 | 0.165                      | 0.165                       | 0                             |                               | 0.127 |
| Fusarium<-pH                 | 0.256          | 0.256         | 0.256          | 0                | 0.256                 | 0.256                      | 0.256                       | 0                             |                               | 0.017 |
| Disease<-pH                  | -0.746         | -0.677        | -0.746         | 0.07             | -0.746                | -0.677                     | -0.746                      | 0.07                          |                               | ***   |

Note: Specific values for each side of the model, including unstandardized and standardized data. *p*- value: \* < 0.05, \*\* < 0.01, \*\*\* < 0.001. The same below.

Table S4 Summary of model-2 internal path coefficients and normalized coefficients

| Model-2                      | Unstandardized |               |                |                  | Standardized          |                            |                             |                               | P     |
|------------------------------|----------------|---------------|----------------|------------------|-----------------------|----------------------------|-----------------------------|-------------------------------|-------|
|                              | Estimate       | Total Effects | Direct Effects | Indirect Effects | Standardized Estimate | Standardized Total Effects | Standardized Direct Effects | Standardized Indirect Effects |       |
| Fungi diversity<-Temperature | 0.615          | 0.631         | 0.615          | 0.016            | 0.676                 | 0.693                      | 0.676                       | 0.017                         | ***   |
| Fungi diversity<-Fusarium    | 0.01           | 0.01          | 0.01           | 0                | 0.011                 | 0.011                      | 0.011                       | 0                             | 0.905 |
| Shannon<-Fungi diversity     | 0.682          | 0.682         | 0.682          | 0                | 0.621                 | 0.621                      | 0.621                       | 0                             | ***   |
| Disease<-Fungi diversity     | -0.344         | -0.344        | -0.344         | 0                | -0.313                | -0.313                     | -0.313                      | 0                             | 0.014 |
| Fusarium<-Temperature        | 0.089          | 0.081         | 0.089          | -0.008           | 0.089                 | 0.081                      | 0.089                       | -0.008                        | 0.422 |
| Disease<-Temperature         | 0.354          | -0.005        | 0.354          | -0.359           | 0.354                 | -0.005                     | 0.354                       | -0.359                        | ***   |
| Fungi diversity<-AN          | 0.082          | 0.082         | 0.082          | 0                | 0.09                  | 0.09                       | 0.09                        | 0                             | 0.333 |
| Ace<-Fungi diversity         | 1              | 1             | 1              | 0                | 0.91                  | 0.91                       | 0.91                        | 0                             |       |
| AN<-Temperature              | 0.184          | 0.184         | 0.184          | 0                | 0.184                 | 0.184                      | 0.184                       | 0                             | 0.088 |
| Disease<-Fusarium            | 0.029          | 0.025         | 0.029          | -0.003           | 0.029                 | 0.025                      | 0.029                       | -0.003                        | 0.653 |
| Fusarium<-AN                 | -0.044         | -0.044        | -0.044         | 0                | -0.044                | -0.044                     | -0.044                      | 0                             | 0.69  |
| Disease<-AN                  | -0.781         | -0.81         | -0.781         | -0.029           | -0.781                | -0.81                      | -0.781                      | -0.029                        | ***   |

Note: Specific values for each side of the model, including unstandardized

and standardized data. *p*- value: \* < 0.05, \*\* < 0.01, \*\*\* < 0.001. The same below.

Table S5 Summary of model-3 internal path coefficients and normalized coefficients

| Model-3                      | Unstandardized |               |                |                  | Standardized          |                            |                             |                               | P     |
|------------------------------|----------------|---------------|----------------|------------------|-----------------------|----------------------------|-----------------------------|-------------------------------|-------|
|                              | Estimate       | Total Effects | Direct Effects | Indirect Effects | Standardized Estimate | Standardized Total Effects | Standardized Direct Effects | Standardized Indirect Effects |       |
| Fungi diversity<-Temperature | 0.556          | 0.63          | 0.556          | 0.074            | 0.576                 | 0.653                      | 0.576                       | 0.077                         | ***   |
| Fungi diversity<-Talaromyces | -0.056         | -0.056        | -0.056         | 0                | -0.058                | -0.058                     | -0.058                      | 0                             | 0.547 |
| Talaromyces<-Temperature     | -0.385         | -0.441        | -0.385         | -0.056           | -0.385                | -0.441                     | -0.385                      | -0.056                        | ***   |
| Shannon<-Fungi diversity     | 0.607          | 0.607         | 0.607          | 0                | 0.586                 | 0.586                      | 0.586                       | 0                             | ***   |
| Disease<-Fungi diversity     | -0.013         | -0.013        | -0.013         | 0                | -0.012                | -0.012                     | -0.012                      | 0                             | 0.925 |
| Disease<-Temperature         | 0.138          | -0.005        | 0.138          | -0.143           | 0.138                 | -0.005                     | 0.138                       | -0.143                        | 0.24  |
| Disease<-Talaromyces         | 0.061          | 0.062         | 0.061          | 0.001            | 0.061                 | 0.062                      | 0.061                       | 0.001                         | 0.533 |
| Ace<-Fungi diversity         | 1              | 1             | 1              | 0                | 0.965                 | 0.965                      | 0.965                       | 0                             |       |
| Fungi diversity<-pH          | 0.301          | 0.32          | 0.301          | 0.019            | 0.312                 | 0.331                      | 0.312                       | 0.02                          | ***   |
| pH<-Temperature              | 0.165          | 0.165         | 0.165          | 0                | 0.165                 | 0.165                      | 0.165                       | 0                             | 0.127 |
| Talaromyces<-pH              | -0.34          | -0.34         | -0.34          | 0                | -0.34                 | -0.34                      | -0.34                       | 0                             | ***   |
| Disease<-pH                  | -0.652         | -0.677        | -0.652         | -0.025           | -0.652                | -0.677                     | -0.652                      | -0.025                        | ***   |

Note: Specific values for each side of the model, including unstandardized and standardized data. *p*- value: \* < 0.05, \*\* < 0.01, \*\*\* < 0.001. The same below.

Table S6 Summary of model-4 internal path coefficients and normalized coefficients

| Model-4                      | Unstandardized |               |                |                  | Standardized          |                            |                             |                               | P     |
|------------------------------|----------------|---------------|----------------|------------------|-----------------------|----------------------------|-----------------------------|-------------------------------|-------|
|                              | Estimate       | Total Effects | Direct Effects | Indirect Effects | Standardized Estimate | Standardized Total Effects | Standardized Direct Effects | Standardized Indirect Effects |       |
| Fungi diversity<-Temperature | 0.529          | 0.619         | 0.529          | 0.091            | 0.617                 | 0.723                      | 0.617                       | 0.106                         | ***   |
| Fungi diversity<-Talaromyces | -0.186         | -0.186        | -0.186         | 0                | -0.218                | -0.218                     | -0.218                      | 0                             | 0.061 |
| Talaromyces<-Temperature     | -0.483         | -0.441        | -0.483         | 0.042            | -0.483                | -0.441                     | -0.483                      | 0.042                         | ***   |
| Shannon<-Fungi diversity     | 0.771          | 0.771         | 0.771          | 0                | 0.66                  | 0.66                       | 0.66                        | 0                             | ***   |
| Disease<-Fungi diversity     | -0.585         | -0.585        | -0.585         | 0                | -0.501                | -0.501                     | -0.501                      | 0                             | 0.012 |



|                      |        |        |        |        |        |        |        |        |       |
|----------------------|--------|--------|--------|--------|--------|--------|--------|--------|-------|
| Disease<-Temperature | 0.272  | -0.005 | 0.272  | -0.277 | 0.272  | -0.005 | 0.272  | -0.277 | 0.083 |
| Disease<-Talaromyces | -0.046 | 0.063  | -0.046 | 0.109  | -0.046 | 0.063  | -0.046 | 0.109  | 0.688 |
| Ace<-Fungi diversity | 1      | 1      | 1      | 0      | 0.856  | 0.856  | 0.856  | 0      |       |
| Fungi diversity<-TN  | -0.078 | -0.005 | -0.078 | 0.073  | -0.091 | -0.006 | -0.091 | 0.085  | 0.386 |
| TN<-Temperature      | -0.107 | -0.107 | -0.107 | 0      | -0.107 | -0.107 | -0.107 | 0      | 0.327 |
| Talaromyces<-TN      | -0.39  | -0.39  | -0.39  | 0      | -0.39  | -0.39  | -0.39  | 0      | ***   |
| Disease<-TN          | -0.606 | -0.585 | -0.606 | 0.021  | -0.606 | -0.585 | -0.606 | 0.021  | ***   |

Note: Specific values for each side of the model, including unstandardized and standardized data. *p*-value: \* < 0.05, \*\* < 0.01, \*\*\* < 0.001. The same below.

Table S7 Summary of model-5 internal path coefficients and normalized coefficients

| Model-5                      | Unstandardized |               |                |                  | Standardized          |                            |                             |                               | P     |
|------------------------------|----------------|---------------|----------------|------------------|-----------------------|----------------------------|-----------------------------|-------------------------------|-------|
|                              | Estimate       | Total Effects | Direct Effects | Indirect Effects | Standardized Estimate | Standardized Total Effects | Standardized Direct Effects | Standardized Indirect Effects |       |
| Fungi diversity<-Temperature | 0.617          | 0.618         | 0.617          | 0.001            | 0.723                 | 0.724                      | 0.723                       | 0.001                         | ***   |
| Fungi diversity<-Fusarium    | 0.001          | 0.001         | 0.001          | 0                | 0.002                 | 0.002                      | 0.002                       | 0                             | 0.987 |
| Shannon<-Fungi diversity     | 0.776          | 0.776         | 0.776          | 0                | 0.662                 | 0.662                      | 0.662                       | 0                             | ***   |
| Disease<-Fungi diversity     | -0.576         | -0.576        | -0.576         | 0                | -0.491                | -0.491                     | -0.491                      | 0                             | 0.009 |
| Fusarium<-Temperature        | 0.094          | 0.081         | 0.094          | -0.013           | 0.094                 | 0.081                      | 0.094                       | -0.013                        | 0.391 |
| Disease<-Temperature         | 0.276          | -0.005        | 0.276          | -0.281           | 0.276                 | -0.005                     | 0.276                       | -0.281                        | 0.081 |
| Ace<-Fungi diversity         | 1              | 1             | 1              | 0                | 0.853                 | 0.853                      | 0.853                       | 0                             |       |
| Fungi diversity<-TN          | -0.007         | -0.007        | -0.007         | 0                | -0.008                | -0.008                     | -0.008                      | 0                             | 0.934 |
| Disease<-Fusarium            | 0.132          | 0.131         | 0.132          | -0.001           | 0.132                 | 0.131                      | 0.132                       | -0.001                        | 0.125 |
| TN<-Temperature              | -0.107         | -0.107        | -0.107         | 0                | -0.107                | -0.107                     | -0.107                      | 0                             | 0.327 |
| Fusarium<-TN                 | 0.119          | 0.119         | 0.119          | 0                | 0.119                 | 0.119                      | 0.119                       | 0                             | 0.277 |
| Disease<-TN                  | -0.604         | -0.585        | -0.604         | 0.02             | -0.604                | -0.585                     | -0.604                      | 0.02                          | ***   |

Note: Specific values for each side of the model, including unstandardized and standardized data. *p*-value: \* < 0.05, \*\* < 0.01, \*\*\* < 0.001.

**Table S8.** Summary of mean NTI and  $\beta$ NTI during fungal assembly.

|                      | averageNTI | $\beta$ NTI | Contribution ratio<br>of random factors |
|----------------------|------------|-------------|-----------------------------------------|
| Seeding              | 3.94       | 0.38        | 5.36                                    |
| Tillering            | 4.66       | -0.28       | 9.50                                    |
| Elongation           | 4.17       | 0.72        | 16.50                                   |
| Maturity             | 3.95       | 0.51        | 4.38                                    |
| Seeding-Tillering    |            | -0.38       | 3.59                                    |
| Tillering-Elongation |            | 0.51        | 8.59                                    |
| Elongation-Maturity  |            | 0.39        | 2.74                                    |

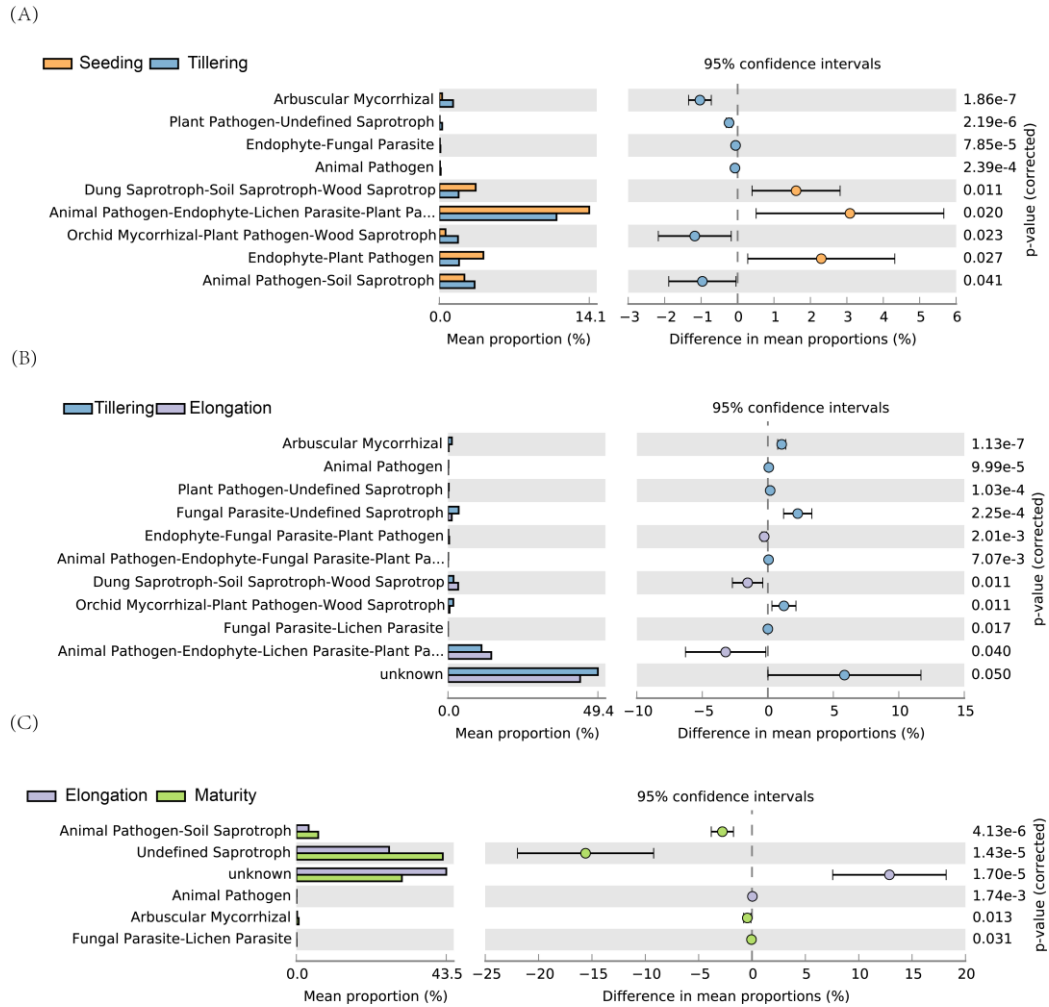

**Figure S6.** The functional classification with significant functional difference phases in different seasons was obtained based on FUNGuild database, differences in seeding, tillering, elongation and maturity (orange, blue, purple and green strips, respectively).

Table S9 Network structure parameters summary table

|         | total positive | total negative | average density | mean degree | closeness |
|---------|----------------|----------------|-----------------|-------------|-----------|
| Seeding | 504            | 366            | 0.28            | 8.03        | 29.00     |

|            |     |     |      |      |       |
|------------|-----|-----|------|------|-------|
| Tillering  | 430 | 436 | 0.23 | 6.65 | 29.13 |
| Elongation | 476 | 382 | 0.21 | 5.94 | 29.07 |
| Maturity   | 452 | 418 | 0.25 | 7.39 | 29.00 |

---

Note: Co-occurrence network based on spearman correlation (Top 30 fungal genera,  $|r| > 0.1, p < 0.05$ )
